# Supplementary material
Source: Elsevier journal article supplement (https://www.sciencedirect.com/science/article/pii/S0021755722000900)
Supplement: mmc1 [file S0021755722000900:mmc1.docx]

**JPED-D-22-00172 - Supplementary materials**

**Appendix S1. The laboratory findings in KD patients in 4 groups before initials IVIG treatment.**

|  | **Early**  **(≤4 days)**  N=40 | **Conventional (5-7 days)**  N=726 | **Conventional (8-10 days)**  N=160 | **Late**  **(>10 days)**  N=39 | ***H*** | ***P*** |
| --- | --- | --- | --- | --- | --- | --- |
| **WBC count (×109/L)**, Median (IQR) | 15.76 (11.28~18.54) | 13.91 (2.92~37.01) | 12.75 (10.08~16.11) | 13.97 (9.72~16.87) | 13.425 | <0.01 |
| **Neutrophils (%)**, Median (IQR) | 67.80 (60.18~79.58) | 68.10 (58.00~78.30) | 62.35 (49.35~71.95) | 58.00 (44.90~73.20) | 32.232 | <0.001 |
| **CRP (mg/L)**, Median (IQR) | 93.50 (63.75~143.50) | 85.50 (47.00~131.00) | 58.50 (29.25~110.00) | 48.00 (20.00~88.00) | 31.931 | <0.001 |
| **Platelet (×109/L)**, Median (IQR) | 334.50 (259.25~431.00) | 330.50 (261.00~414.00) | 410.50 (327.75~524.50) | 473.00 (350.00~602.00) | 73.604 | <0.001 |
| **Albumin (mg/L)**, Median (IQR) | 38.60 (34.85~40.98) | 37.30 (34.30~39.90) | 36.64 (33.90~39.30) | 36.50 (33.30~39.90) | 3.750 | 0.290 |
| **AST (****IU/L)**, Median (IQR) | 34.85 (28.02~71.90) | 35.20 (25.78~57.38) | 30.95 (24.72~46.78) | 33.80 (25.60~39.20) | 9.891 | 0.020 |
| **ALT (IU/L)**, Median (IQR) | 38.15 (21.82~53.00) | 33.45 (16.18~85.73) | 23.85 (15.00~51.08) | 21.30 (16.80~35.30) | 15.283 | <0.01 |
| **HB (g/L)**, Median (IQR) | 112.00 (104.00~118.50) | 108.00 (101.00~116.00) | 105.00 (98.00~111.00) | 107.00 (93.00~114.00) | 15.669 | <0.01 |
| **ESR (mm/h)**, Median (IQR) | 60.00 (40.00~90.00) | 72.00 (50.00~91.25) | 73.56 (53.00~91.75) | 70.00 (38.00~91.00) | 2.370 | 0.499 |

White blood cell = WBC; C-reactive protein = CRP; AST = aspartate aminotransferase; ALT = alanine aminotransferase; Hemoglobin = HB; Erythrocyte sedimentation Rate = ESR.

**Appendix S2. Results of the sensitivity analyses for the primary outcomes and secondary outcome.**

|  | **(≤7 days)**  N=766 | **(＞7 days)**  N=199 | P | OR | 95%C.I. of OR | |
| --- | --- | --- | --- | --- | --- | --- |
| Lower | Upper |
| IVIG-resistance | 79 | 22 | 0.761 | 0.925 | 0.561 | 1.53 |
| Coronary artery abnormalities (Z≥2) | 158 | 55 | 0.034 | 0.680 | 0.476 | 0.972 |
| Length of hospitalization (day), Median (IQR) | 7.00 (6.00~9.00) | 7.00 (6.00~10.00) | 0.033 | / | / | / |

**Appendix S3. ROC curve analysis of initial IVIG administration time to predict IVIG resistance.**

**ROC = receiver operating characteristic; AUC = area under the curve.**

**Appendix S4. Multivariate logistic regression analysis of KD patients with initial IVIG resistance.**

|  | B | S.E. | Wald | P | OR | 95%C.I. of OR | |
| --- | --- | --- | --- | --- | --- | --- | --- |
| Lower | Upper |
| Diagnosis (incomplete vs complete Kawasaki) | -0.321 | 0.475 | 0.457 | 0.499 | 0.725 | 0.286 | 1.840 |
| Age (months) | 0.013 | 0.005 | 5.387 | 0.020 | 1.013 | 1.002 | 1.024 |
| Gender  (female vs male) | -0.161 | 0.230 | 0.491 | 0.483 | 0.851 | 0.542 | 1.336 |
| CRP | 0.003 | 0.002 | 1.821 | 0.177 | 1.003 | 0.999 | 1.007 |
| Albumin | -0.082 | 0.027 | 9.501 | <0.01 | 0.921 | 0.874 | 0.970 |
| ALT | 0.001 | 0.001 | 0.845 | 0.358 | 1.001 | 0.999 | 1.002 |
| Cardiac Complications (Z value) | 0.103 | 0.053 | 3.774 | 0.052 | 1.108 | 0.999 | 1.229 |
| Platelet | -0.001 | 0.001 | 1.548 | 0.213 | 0.999 | 0.997 | 1.001 |
| Neutrophils (%) | 0.017 | 0.009 | 3.590 | 0.058 | 1.017 | 0.999 | 1.036 |

**Appendix S5. Multivariate logistic regression analysis of KD patients with CAA.**

|  | B | S.E. | Wald | P | OR | 95%C.I. of OR | |
| --- | --- | --- | --- | --- | --- | --- | --- |
| Lower | Upper |
| Diagnosis (incomplete vs complete Kawasaki) | 0.898 | 0.253 | 12.543 | <0.001 | 2.454 | 1.493 | 4.033 |
| Age (months) | -0.004 | 0.004 | 1.094 | 0.296 | 0.996 | 0.987 | 1.004 |
| Gender (female vs male) | -0.397 | 0.168 | 5.582 | 0.018 | 0.672 | 0.484 | 0.935 |
| CRP | 0.005 | 0.002 | 8.793 | <0.01 | 1.005 | 1.002 | 1.008 |
| Albumin | -0.052 | 0.021 | 6.218 | 0.013 | 0.949 | 0.911 | 0.989 |
| ALT | 0.001 | 0.001 | 1.088 | 0.297 | 1.001 | 0.999 | 1.002 |
| HB | -0.003 | 0.007 | 0.128 | 0.720 | 0.997 | 0.983 | 1.012 |
| IVIG-resistance | 0.345 | 0.244 | 1.993 | 0.158 | 1.412 | 0.875 | 2.280 |
